# Supplementary material for: Serum galactose-deficient-IgA1 and IgG autoantibodies correlate in patients with IgA nephropathy
Source: PLOS journal article supplement (doi:10.1371/journal.pone.0190967), 2018-01-11
Supplement: S2 (10.1371/journal.pone.0190967.s002) [file journal.pone.0190967.s002]

## Supplementary S1 Table

### Biopsy-proven renal diseases in chronic kidney disease (CKD) controls.

| Renal disease                      | N  |
|------------------------------------|----|
| Diabetic nephropathy               | 30 |
| Membranous nephropathy             | 9  |
| Non-IgAN proliferative nephropathy | 9  |
| Lupus nephritis                    | 8  |
| Minimal change nephrotic syndrome  | 6  |
| Nephrosclerosis                    | 4  |
| Interstitial nephritis             | 2  |
| Focal segmental glomerulosclerosis | 2  |
| ANCA-related nephritis*            | 1  |
| Scleroderma renal crisis           | 1  |
| HCV-related nephritis <sup>+</sup> | 1  |
| Fabry's disease                    | 1  |
| Acute post-streptococcal nephritis | 1  |
| Minor glomerular abnormality       | 1  |

\* ANCA: anti-neutrophil cytoplasmic antibody

<sup>+</sup>HCV: hepatitis C virus
